# Supplementary material
Source: PubMed Central journal article supplement (PMC1291220)

Figure S1

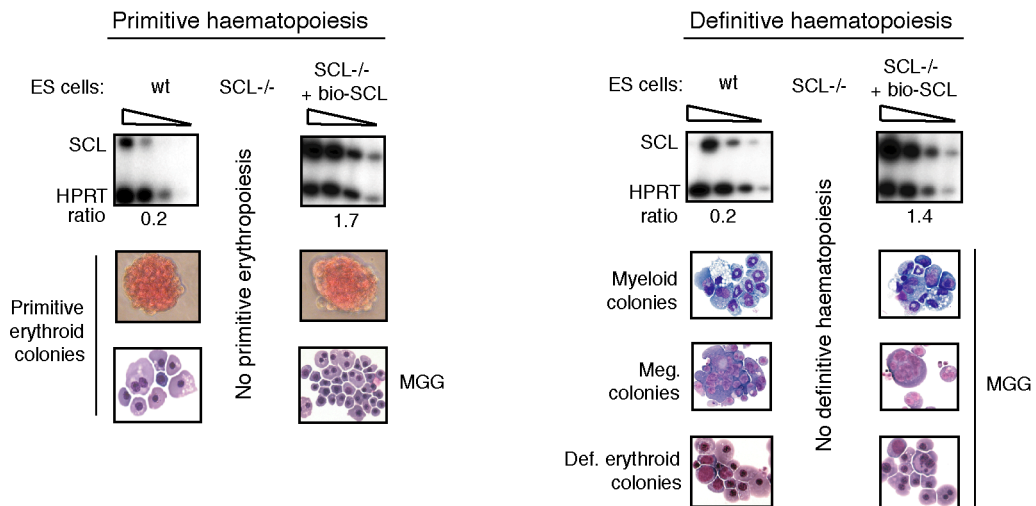

Figure S2

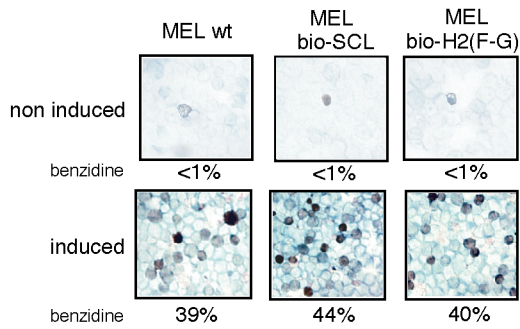

Figure S3

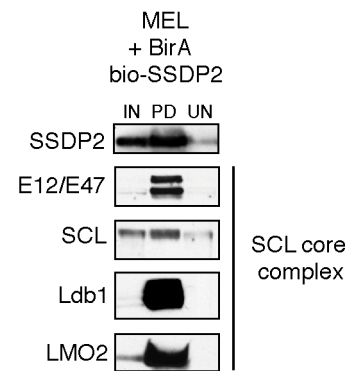

Figure S4

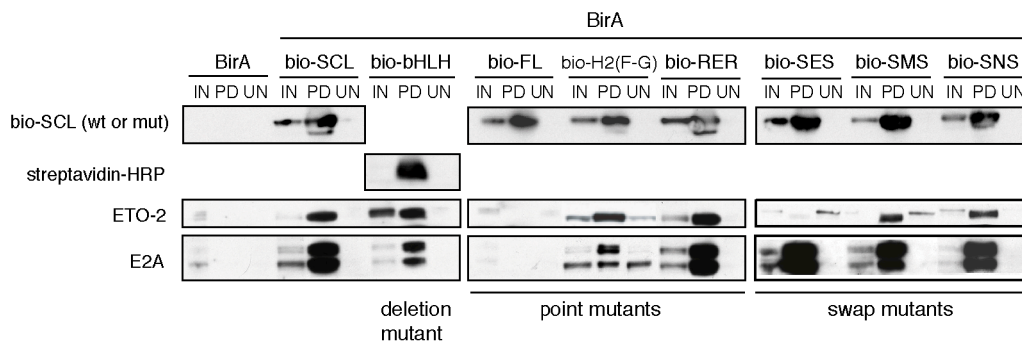

Supplement: molcellb_25_23_10235__2.pdf [file molcellb_25_23_10235__2.pdf]

Figure S5

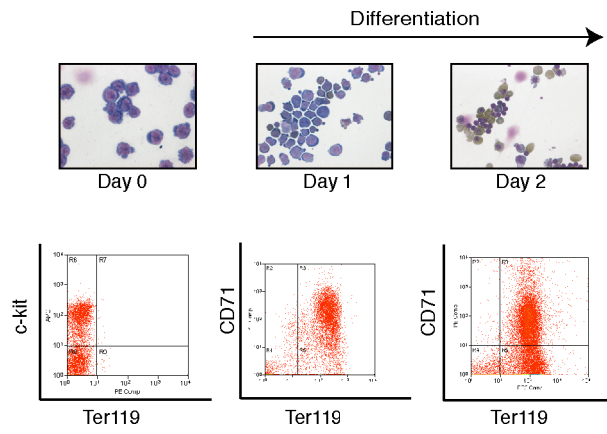

Figure S6

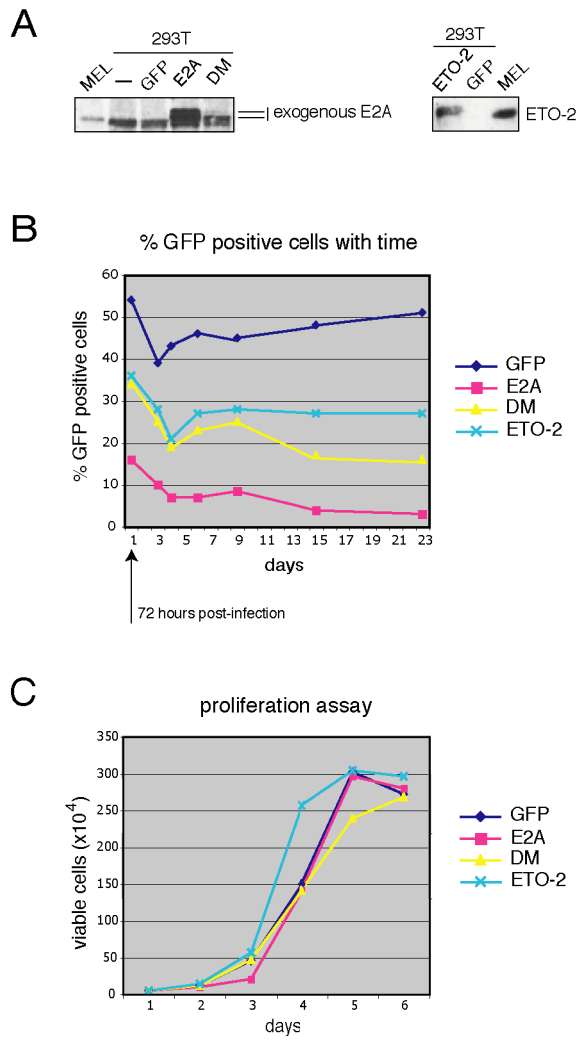

Supplement: molcellb_25_23_10235__3.pdf [file molcellb_25_23_10235__3.pdf]
